# Supplementary material for: Early Access to Testosterone Therapy in Transgender and Gender-Diverse Adults Seeking Masculinization: A Randomized Clinical Trial
Source: PubMed Central journal article supplement (PMC10485726; doi:10.1001/jamanetworkopen.2023.31919), 2023-09-07
Supplement: jamanetwopen-e2331919-s002.pdf [file jamanetwopen-e2331919-s002.pdf]

## Data Sharing Statement

Nolan. Early Access to Testosterone Therapy in Transgender and Gender-Diverse Adults Seeking Masculinization. *JAMA Netw Open*. Published September 07, 2023.  
doi:10.1001/jamanetworkopen.2023.31919

### Data

**Data available:** Yes

**Data types:** Deidentified participant data

**How to access data:** [nolan.b@unimelb.edu.au](mailto:nolan.b@unimelb.edu.au)

**When available:** With publication

### Supporting Documents

**Document types:** None

### Additional Information

**Who can access the data:** Researchers whose proposed use of the data has been approved

**Types of analyses:** For a specified purpose

**Mechanisms of data availability:** With a signed data access agreement
